# Supplementary material for: An open-source high-speed infrared videography database to study the principles of active sensing in freely navigating rodents
Source: PubMed Central journal article supplement (PMC6283211; doi:10.1093/gigascience/giy134), 2018-11-10

# GigaScience

## An open-source high-speed infrared videography database to study the principles of active sensing in freely navigating rodents --Manuscript Draft--

|                                                      |                                                                                                                                                                                                                                                                                                                                                                                                                                                                                                                                                                                                                                                                                                                                                                                                                                                                                                                                                                                                                                                                                                                                                                                                                                                                                                                                                                                                                                                                                                                                                                                                                                                                                                                                                                                                                                                                                                                                                                                  |                   |
|------------------------------------------------------|----------------------------------------------------------------------------------------------------------------------------------------------------------------------------------------------------------------------------------------------------------------------------------------------------------------------------------------------------------------------------------------------------------------------------------------------------------------------------------------------------------------------------------------------------------------------------------------------------------------------------------------------------------------------------------------------------------------------------------------------------------------------------------------------------------------------------------------------------------------------------------------------------------------------------------------------------------------------------------------------------------------------------------------------------------------------------------------------------------------------------------------------------------------------------------------------------------------------------------------------------------------------------------------------------------------------------------------------------------------------------------------------------------------------------------------------------------------------------------------------------------------------------------------------------------------------------------------------------------------------------------------------------------------------------------------------------------------------------------------------------------------------------------------------------------------------------------------------------------------------------------------------------------------------------------------------------------------------------------|-------------------|
| <b>Manuscript Number:</b>                            | GIGA-D-18-00333R1                                                                                                                                                                                                                                                                                                                                                                                                                                                                                                                                                                                                                                                                                                                                                                                                                                                                                                                                                                                                                                                                                                                                                                                                                                                                                                                                                                                                                                                                                                                                                                                                                                                                                                                                                                                                                                                                                                                                                                |                   |
| <b>Full Title:</b>                                   | An open-source high-speed infrared videography database to study the principles of active sensing in freely navigating rodents                                                                                                                                                                                                                                                                                                                                                                                                                                                                                                                                                                                                                                                                                                                                                                                                                                                                                                                                                                                                                                                                                                                                                                                                                                                                                                                                                                                                                                                                                                                                                                                                                                                                                                                                                                                                                                                   |                   |
| <b>Article Type:</b>                                 | Data Note                                                                                                                                                                                                                                                                                                                                                                                                                                                                                                                                                                                                                                                                                                                                                                                                                                                                                                                                                                                                                                                                                                                                                                                                                                                                                                                                                                                                                                                                                                                                                                                                                                                                                                                                                                                                                                                                                                                                                                        |                   |
| <b>Funding Information:</b>                          | H2020 European Research Council (660328)                                                                                                                                                                                                                                                                                                                                                                                                                                                                                                                                                                                                                                                                                                                                                                                                                                                                                                                                                                                                                                                                                                                                                                                                                                                                                                                                                                                                                                                                                                                                                                                                                                                                                                                                                                                                                                                                                                                                         | Dr. Tansu Celikel |
|                                                      | Interreg (122035)                                                                                                                                                                                                                                                                                                                                                                                                                                                                                                                                                                                                                                                                                                                                                                                                                                                                                                                                                                                                                                                                                                                                                                                                                                                                                                                                                                                                                                                                                                                                                                                                                                                                                                                                                                                                                                                                                                                                                                | Dr. Tansu Celikel |
|                                                      | Nederlandse Organisatie voor Wetenschappelijk Onderzoek (824.14.022)                                                                                                                                                                                                                                                                                                                                                                                                                                                                                                                                                                                                                                                                                                                                                                                                                                                                                                                                                                                                                                                                                                                                                                                                                                                                                                                                                                                                                                                                                                                                                                                                                                                                                                                                                                                                                                                                                                             | Dr. Tansu Celikel |
| <b>Abstract:</b>                                     | <p>Background: Active sensing is crucial for navigation. It is characterized by self-generated motor action controlling the accessibility and processing of sensory information. In rodents, active sensing is commonly studied in the whisker system. As rats and mice modulate their whisking contextually, they employ frequency and amplitude modulation. Understanding the development, mechanisms and plasticity of adaptive motor control will require precise behavioral measurements of whisker position.</p> <p>Findings: Advances in high-speed videography and analytical methods now permit collection and systematic analysis of large datasets. Here we provide 6642 videos as freely moving juvenile (3rd-4th postnatal week) and adult rodents explore a stationary object on the gap-crossing task. The dataset includes sensory exploration with single- or multi-whiskers in wild-type animals, serotonin transporter knock-out rats, rats received pharmacological intervention targeting serotonergic signaling. The dataset includes varying background illumination conditions and signal-to-noise ratios (SNRs), ranging from homogenous/high contrast to non-homogenous/low-contrast. A subset of videos has been whisker and nose tracked, and are provided as reference for image processing algorithms.</p> <p>Conclusions: The recorded behavioral data can be directly used to study (1) development of sensorimotor computation, (2) top-down mechanisms that control sensory navigation and whisker position, (3) cross-species comparison of active sensing. It could also help to address contextual modulation of active sensing during touch induced whisking in head-fixed versus freely behaving animals. And finally, it provides the necessary data for machine learning approaches for automated analysis of sensory and motion parameters across a wide variety of SNRs with accompanying human observer determined ground-truth.</p> |                   |
| <b>Corresponding Author:</b>                         | Tansu Celikel, PhD<br>Donders Institute for Brain, Cognition and Behaviour<br>NETHERLANDS                                                                                                                                                                                                                                                                                                                                                                                                                                                                                                                                                                                                                                                                                                                                                                                                                                                                                                                                                                                                                                                                                                                                                                                                                                                                                                                                                                                                                                                                                                                                                                                                                                                                                                                                                                                                                                                                                        |                   |
| <b>Corresponding Author Secondary Information:</b>   |                                                                                                                                                                                                                                                                                                                                                                                                                                                                                                                                                                                                                                                                                                                                                                                                                                                                                                                                                                                                                                                                                                                                                                                                                                                                                                                                                                                                                                                                                                                                                                                                                                                                                                                                                                                                                                                                                                                                                                                  |                   |
| <b>Corresponding Author's Institution:</b>           | Donders Institute for Brain, Cognition and Behaviour                                                                                                                                                                                                                                                                                                                                                                                                                                                                                                                                                                                                                                                                                                                                                                                                                                                                                                                                                                                                                                                                                                                                                                                                                                                                                                                                                                                                                                                                                                                                                                                                                                                                                                                                                                                                                                                                                                                             |                   |
| <b>Corresponding Author's Secondary Institution:</b> |                                                                                                                                                                                                                                                                                                                                                                                                                                                                                                                                                                                                                                                                                                                                                                                                                                                                                                                                                                                                                                                                                                                                                                                                                                                                                                                                                                                                                                                                                                                                                                                                                                                                                                                                                                                                                                                                                                                                                                                  |                   |
| <b>First Author:</b>                                 | Alireza Azarfar                                                                                                                                                                                                                                                                                                                                                                                                                                                                                                                                                                                                                                                                                                                                                                                                                                                                                                                                                                                                                                                                                                                                                                                                                                                                                                                                                                                                                                                                                                                                                                                                                                                                                                                                                                                                                                                                                                                                                                  |                   |
| <b>First Author Secondary Information:</b>           |                                                                                                                                                                                                                                                                                                                                                                                                                                                                                                                                                                                                                                                                                                                                                                                                                                                                                                                                                                                                                                                                                                                                                                                                                                                                                                                                                                                                                                                                                                                                                                                                                                                                                                                                                                                                                                                                                                                                                                                  |                   |
| <b>Order of Authors:</b>                             | Alireza Azarfar                                                                                                                                                                                                                                                                                                                                                                                                                                                                                                                                                                                                                                                                                                                                                                                                                                                                                                                                                                                                                                                                                                                                                                                                                                                                                                                                                                                                                                                                                                                                                                                                                                                                                                                                                                                                                                                                                                                                                                  |                   |
|                                                      | Yiping Zhang                                                                                                                                                                                                                                                                                                                                                                                                                                                                                                                                                                                                                                                                                                                                                                                                                                                                                                                                                                                                                                                                                                                                                                                                                                                                                                                                                                                                                                                                                                                                                                                                                                                                                                                                                                                                                                                                                                                                                                     |                   |
|                                                      | Artoghrl Alishbayli                                                                                                                                                                                                                                                                                                                                                                                                                                                                                                                                                                                                                                                                                                                                                                                                                                                                                                                                                                                                                                                                                                                                                                                                                                                                                                                                                                                                                                                                                                                                                                                                                                                                                                                                                                                                                                                                                                                                                              |                   |

|                                                                                                                                                                                                                                                                                                                                                                         |                                                                                                                                                                                                                                                  |
|-------------------------------------------------------------------------------------------------------------------------------------------------------------------------------------------------------------------------------------------------------------------------------------------------------------------------------------------------------------------------|--------------------------------------------------------------------------------------------------------------------------------------------------------------------------------------------------------------------------------------------------|
|                                                                                                                                                                                                                                                                                                                                                                         | Stéphanie Miceli                                                                                                                                                                                                                                 |
|                                                                                                                                                                                                                                                                                                                                                                         | Lara Kepser                                                                                                                                                                                                                                      |
|                                                                                                                                                                                                                                                                                                                                                                         | Daan van der Wielen                                                                                                                                                                                                                              |
|                                                                                                                                                                                                                                                                                                                                                                         | Mike van de Moosdijk                                                                                                                                                                                                                             |
|                                                                                                                                                                                                                                                                                                                                                                         | Judith Homberg                                                                                                                                                                                                                                   |
|                                                                                                                                                                                                                                                                                                                                                                         | Dirk Schubert                                                                                                                                                                                                                                    |
|                                                                                                                                                                                                                                                                                                                                                                         | Rémi Proville                                                                                                                                                                                                                                    |
|                                                                                                                                                                                                                                                                                                                                                                         | Tansu Celikel, PhD                                                                                                                                                                                                                               |
| <b>Order of Authors Secondary Information:</b>                                                                                                                                                                                                                                                                                                                          |                                                                                                                                                                                                                                                  |
| <b>Response to Reviewers:</b>                                                                                                                                                                                                                                                                                                                                           | We would like to thank the reviewers for their insight. The manuscript is now edited to fulfill the changes requested in the decision letter. We would like to thank the unmatched and continuous professional editorial support at Gigascience. |
| <b>Additional Information:</b>                                                                                                                                                                                                                                                                                                                                          |                                                                                                                                                                                                                                                  |
| <b>Question</b>                                                                                                                                                                                                                                                                                                                                                         | <b>Response</b>                                                                                                                                                                                                                                  |
| Are you submitting this manuscript to a special series or article collection?                                                                                                                                                                                                                                                                                           | No                                                                                                                                                                                                                                               |
| <b>Experimental design and statistics</b>                                                                                                                                                                                                                                                                                                                               | Yes                                                                                                                                                                                                                                              |
| Full details of the experimental design and statistical methods used should be given in the Methods section, as detailed in our <a href="#">Minimum Standards Reporting Checklist</a> . Information essential to interpreting the data presented should be made available in the figure legends.                                                                        |                                                                                                                                                                                                                                                  |
| Have you included all the information requested in your manuscript?                                                                                                                                                                                                                                                                                                     |                                                                                                                                                                                                                                                  |
| <b>Resources</b>                                                                                                                                                                                                                                                                                                                                                        | Yes                                                                                                                                                                                                                                              |
| A description of all resources used, including antibodies, cell lines, animals and software tools, with enough information to allow them to be uniquely identified, should be included in the Methods section. Authors are strongly encouraged to cite <a href="#">Research Resource Identifiers</a> (RRIDs) for antibodies, model organisms and tools, where possible. |                                                                                                                                                                                                                                                  |
| Have you included the information requested as detailed in our <a href="#">Minimum Standards Reporting Checklist</a> ?                                                                                                                                                                                                                                                  |                                                                                                                                                                                                                                                  |

|                                                                                                                                                                                                                                                                                                                                                                                                                                                                                                                                                         |            |
|---------------------------------------------------------------------------------------------------------------------------------------------------------------------------------------------------------------------------------------------------------------------------------------------------------------------------------------------------------------------------------------------------------------------------------------------------------------------------------------------------------------------------------------------------------|------------|
| <p><b>Availability of data and materials</b></p> <p>All datasets and code on which the conclusions of the paper rely must be either included in your submission or deposited in <a href="#">publicly available repositories</a> (where available and ethically appropriate), referencing such data using a unique identifier in the references and in the “Availability of Data and Materials” section of your manuscript.</p> <p>Have you have met the above requirement as detailed in our <a href="#">Minimum Standards Reporting Checklist?</a></p> | <p>Yes</p> |
|---------------------------------------------------------------------------------------------------------------------------------------------------------------------------------------------------------------------------------------------------------------------------------------------------------------------------------------------------------------------------------------------------------------------------------------------------------------------------------------------------------------------------------------------------------|------------|

[Click here to view linked References](#)

1  
2  
3  
4 *A Datanote submission to GigaScience*  
5  
6  
7  
8  
9

10 **An open-source high-speed infrared videography database to study the principles of active**  
11 **sensing in freely navigating rodents**  
12  
13  
14

15 Alireza Azarfar<sup>1</sup>, Yiping Zhang<sup>1</sup>, Artoghrl Alishbayli<sup>1</sup>, Stéphanie Miceli<sup>2, CA</sup>, Lara Kepser<sup>2</sup>,  
16 Daan van der Wielen<sup>1</sup>, Mike van de Moosdijk<sup>1</sup>, Judith Homberg<sup>2</sup>, Dirk Schubert<sup>2,1</sup>,  
17 Rémi Proville<sup>1</sup>, Tansu Celikel<sup>1\*</sup>  
18  
19  
20

21 (1) Department of Neurophysiology, Donders Institute for Brain, Cognition, and Behaviour,  
22 Radboud University, Nijmegen - the Netherlands. (2) Department of Cognitive Neuroscience,  
23 Donders Institute for Brain, Cognition, and Behaviour, Radboud University Medical School,  
24 Nijmegen - the Netherlands. <sup>CA</sup> Current address: Center of Advanced European Studies and  
25 Research, Bonn, Germany  
26  
27  
28  
29  
30

31 E-mail addresses: [a.azarfar@neurophysiology.nl](mailto:a.azarfar@neurophysiology.nl), [y.zhang@neurophysiology.nl](mailto:y.zhang@neurophysiology.nl),  
32 [a.alishbayli@neurophysiology.nl](mailto:a.alishbayli@neurophysiology.nl), [stephanie.miceli@caesar.de](mailto:stephanie.miceli@caesar.de), [larakepser11@gmail.com](mailto:larakepser11@gmail.com),  
33 [d.vanderwielen@neurophysiology.nl](mailto:d.vanderwielen@neurophysiology.nl), [m.vandemoosdijk@neurophysiology.nl](mailto:m.vandemoosdijk@neurophysiology.nl),  
34 [judith.homberg@radboudumc.nl](mailto:judith.homberg@radboudumc.nl), [d.schubert@donders.ru.nl](mailto:d.schubert@donders.ru.nl), [r.proville@neurophysiology.nl](mailto:r.proville@neurophysiology.nl),  
35 [t.celikel@neurophysiology.nl](mailto:t.celikel@neurophysiology.nl)  
36  
37

38 Authors' ORCID IDs:

39  
40 Alireza Azarfar 0000-0002-2260-5399

41  
42 Yiping Zhang 0000-0002-4142-2483

43  
44 Artoghrl Alishbayli 0000-0002-1009-2549

45  
46 Stéphanie Miceli 0000-0001-8513-0549

47  
48 Lara Kepser 0000-0002-8451-4708

49  
50 Daan van der Wielen 0000-0002-7282-6034

51  
52 Mike van de Moosdijk 0000-0002-7390-9608

53  
54 Judith Homberg 0000-0002-7621-1010

55  
56 Dirk Schubert 0000-0002-1202-4363  
57  
58  
59  
60  
61  
62  
63  
64  
65

1  
2  
3  
4  
5  
6  
7  
8  
9  
10  
11  
12  
13  
14  
15  
16  
17  
18  
19  
20  
21  
22  
23  
24  
25  
26  
27  
28  
29  
30  
31  
32  
33  
34  
35  
36  
37  
38  
39  
40  
41  
42  
43  
44  
45  
46  
47  
48  
49  
50  
51  
52  
53  
54  
55  
56  
57  
58  
59  
60  
61  
62  
63  
64  
65

Remi Proville 0000-0002-5829-1344

Tansu Celikel 0000-0002-9629-0334

\*Corresponding author: Tansu Celikel

1  
2  
3  
4 **Abstract**  
5  
6  
7

8 **Background:** Active sensing is crucial for navigation. It is characterized by self-generated motor  
9 action controlling the accessibility and processing of sensory information. In rodents, active  
10 sensing is commonly studied in the whisker system. As rats and mice modulate their whisking  
11 contextually, they employ frequency and amplitude modulation. Understanding the development,  
12 mechanisms and plasticity of adaptive motor control will require precise behavioral measurements  
13 of whisker position.  
14  
15

16  
17  
18 **Findings:** Advances in high-speed videography and analytical methods now permit collection and  
19 systematic analysis of large datasets. Here we provide 6642 videos as freely moving juvenile (3rd-  
20 4th postnatal week) and adult rodents explore a stationary object on the gap-crossing task. The  
21 dataset includes sensory exploration with single- or multi-whiskers in wild-type animals, serotonin  
22 transporter knock-out rats, rats received pharmacological intervention targeting serotonergic  
23 signaling. The dataset includes varying background illumination conditions and signal-to-noise  
24 ratios (SNRs), ranging from homogenous/high contrast to non-homogenous/low-contrast. A  
25 subset of videos has been whisker and nose tracked, and are provided as reference for image  
26 processing algorithms.  
27  
28

29  
30  
31 **Conclusions:** The recorded behavioral data can be directly used to study (1) development of  
32 sensorimotor computation, (2) top-down mechanisms that control sensory navigation and whisker  
33 position, (3) cross-species comparison of active sensing. It could also help to address contextual  
34 modulation of active sensing during touch induced whisking in head-fixed versus freely behaving  
35 animals. And finally, it provides the necessary data for machine learning approaches for automated  
36 analysis of sensory and motion parameters across a wide variety of SNRs with accompanying  
37 human observer determined ground-truth.  
38  
39

40  
41  
42 **Keywords:** Mystacial vibrissae, object localization, goal-directed behavior, mouse, rat,  
43 sensorimotor computation, whisking  
44  
45  
46  
47  
48  
49

## Data description

### Context

Whiskers, or mystacial vibrissae, are sensory hairs that are densely organized as a grid on the snout. Rats and mice actively move their whiskers in an oscillatory motion to explore their environment as they integrate sensory information spatiotemporally across whiskers and whisk cycles [1–5]. The motor control of whisker position is a result of sensorimotor computation where sensory information collected during the last ~3 whisk cycles is used to plan the whisker motion for the subsequent whisk cycle [6]. Although animals can perceive passive touch before the onset of whisking [7], it is not known when and where in the brain the sensorimotor computation for adaptive motor control for whisker position emerge. Moreover, the mechanisms responsible for the development and plasticity of sensorimotor computation are largely unknown. Because sensorimotor integration is contextually regulated [8–12], altered by the change in neuronal excitability along the sensorimotor circuits [13] and based on experience and the current state of the sensory organs [1], identification of the principles of sensorimotor computation will require large scale behavioral experiments where sensory input on whiskers and motor control of whisker position are studied at high spatiotemporal resolution. Here we introduce the first iteration of such a dataset as freely moving rodents locate a tactile target under infrared light. The dataset includes independent variables of species (rat vs mouse), developmental age (juvenile vs adult, i.e. 3-5 postnatal weeks and >6 weeks, respectively), sensory deprivation (single vs multi whisker) and genetic background (i.e. SERT knock-down vs control, see below). The database might serve researchers across a broad range of disciplines, including cellular, behavioral, systems, cognitive neuroscience, and ethology, biomimetics, robotics, artificial intelligence, computer vision and active sensing communities, to study and model the principles of active sensing.

1  
2  
3  
4  
5  
6  
7 **Animals**  
8

9 All experiments have been performed according to the Dutch law concerning animal welfare and  
10 the guidelines for the care and use of laboratory animals upon institutional ethical committee  
11 approval. All efforts have been made to minimize animal suffering and discomfort, and all  
12 precautions were taken to reduce the number of animals used.  
13  
14  
15  
16  
17  
18  
19  
20

21 The experiments were performed on 38 male rats and 10 male mice. Rats were either genetically  
22 engineered or pharmacologically treated to alter serotonergic neurotransmission, a  
23 neuromodulatory neurotransmitter that contributes to motor control [14], stimulus encoding in the  
24 barrel cortex [15], and is believed to modulate development and maturation of sensorimotor  
25 circuits [16]. Experiments in rats also included corresponding wild type and vehicle injection  
26 controls. Mice were on the C57Bl6 background (B6;129P2-Pvalbtm1(cre)Arbr/J, The Jackson  
27 Laboratory, RRID:MGI:5315557). Parvalbumin neurons in this line express Cre-recombinase but  
28 the mice were otherwise not genetically or pharmacologically altered. The founder line was  
29 outcrossed to C57Bl6 for 20+ generations before the start of experiments. All mice were studied  
30 between 2-4 months of age.  
31  
32  
33  
34  
35  
36  
37  
38  
39  
40  
41  
42  
43  
44  
45  
46  
47

48 Serotonin transporter knockout rats (*Slc6a41<sup>Hubr</sup>*) were generated on a Wistar background by N-  
49 ethyl-N-nitrosurea (ENU)-induced mutagenesis as described before [17]. Experimental animals  
50 were derived from heterozygous 5-HT transporter knockout (*5HTT<sup>-/-</sup>*) rats that were outcrossed  
51 for 12+ generations with wild-type Wistar rats obtained from Harlan Laboratories (Horst, The  
52 Netherlands). Ear punches were taken at the age of 21 days after weaning for genotyping and  
53  
54  
55  
56  
57  
58  
59  
60  
61  
62  
63  
64  
65



1  
2  
3  
4 5HTT<sup>-/-</sup> and 5HTT<sup>+/+</sup> rats were randomly assigned to SERT KO (N=14 rats) and WT groups (N=14  
5  
6 rats), respectively.  
7  
8  
9

10  
11 5-HT transporter deletion alters neural function starting from embryonic brain development [17].  
12  
13 Thus, in a second group of rats, we interfered with the serotonergic system after birth, and only  
14 transiently when serotonergic innervations appear in the barrel cortex [9]. Fluoxetine  
15 hydrochloride (10 mg/kg/day, Sigma Aldrich), a selective serotonin reuptake inhibitor, was  
16 dissolved in water and administered orally. Age matched dams in a separate cage received tap  
17 water and were considered as Vehicle controls. The fluoxetine administration started after birth  
18 (P1) and continued for 7 days, corresponding to the period of postnatal development critical for  
19 the maturation of thalamocortical projections [18]. The pups of all groups (Fluoxetine, N=5;  
20 Vehicle, N=5) were kept together with their mothers until weaning.  
21  
22  
23  
24  
25  
26  
27  
28  
29  
30  
31  
32  
33  
34  
35

### 36 **Animal handling and behavioral observations**

37  
38 Animal behavior was studied as they located (or attempted to locate) a tactile target under infrared  
39 light between postnatal days (P) 21-P30, i.e. as juveniles, and/or after they reached sexual maturity  
40 (Figure 1). Animal handling protocols were similar to those employed previously [1, 6, 8, 13].  
41  
42 Experiments started with a familiarization session (20 min/animal) where P18 pup (in rats) or adult  
43 mouse subjects were introduced to the experimenter and the experimental room the first time.  
44  
45 Habituation to the set-up consisted of two 20 minute sessions under no visible light but with white  
46 noise. The training sessions (N=10/rat; N=30/mouse) lasted 30 minutes (or 30 successful trials) in  
47  
48 which the gap distance (see below) was randomly drawn from a Gaussian distribution. With  
49  
50 increasing number of sessions, the mean of the distribution was increased and variance reduced,  
51  
52  
53  
54  
55  
56  
57  
58  
59  
60  
61  
62  
63  
64  
65

1  
2  
3  
4 adapting each animal’s individual learning curve, to ensure animals preferentially use their  
5  
6 whiskers for target localization in majority of the trials. The set-up was cleaned with ethanol  
7  
8 between sessions.  
9

10  
11  
12  
13  
14 One day before the sessions that required animals to perform the task with a restricted set of  
15  
16 whiskers, animals were anesthetized using isoflurane. Half of the animals received whisker  
17  
18 plucking sparing a single (C2) whisker or single (C) row bilaterally; the other half received “sham  
19  
20 plucking” during which they were handled similarly to the whisker deprived animals, however  
21  
22 their whiskers were left unplucked. Whisker regrowth was assessed every day, and if needed  
23  
24 whisker plucking was repeated.  
25  
26  
27  
28  
29  
30  
31

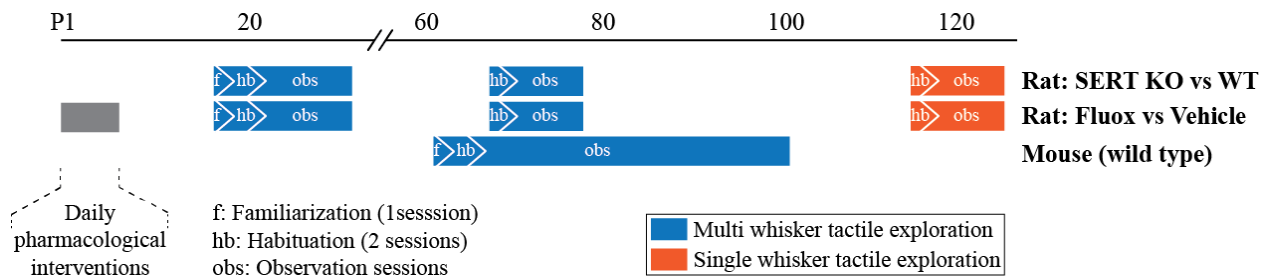

43 **Figure 1. The timeline of experiments and handling.** See main text for details.

44  
45  
46  
47  
48  
49 **The behavioral paradigm: Tactile object localization**

50  
51  
52 We observed animals, under infrared light, as they shuttled between two elevated platforms with  
53  
54 a variable gap-distance in between them. The animals were not food deprived; neither did they  
55  
56 receive any reward for successful task execution. In this, so called spontaneous gap-crossing task  
57  
58  
59 [1, 6, 8, 13], the distance between the platforms is varied to enable observation of whisker  
60  
61  
62  
63  
64  
65

1  
2  
3  
4 dependent tactile object localization. In our training protocols, the gap-distance was randomly  
5  
6 selected from a normal distribution whose mean increases and variance reduces with repeated  
7  
8 training (i.e. increased number of training sessions) as described before [15]. Catch trials, where  
9  
10 the target platform is positioned just outside of the animal's reach, were randomly introduced  
11  
12 (~15% of successful trials) to ensure that the task execution required tactile exploration and was  
13  
14 not a result of expectation and sensorimotor habit formation.  
15  
16  
17  
18  
19  
20

### 21 **The experimental set-up and data acquisition**

22  
23 The experimental set-up consists of two elevated platforms and a high-speed camera that are  
24  
25 mobilized by linear actuators (Figure 2A). The animal position on the platforms are tracked using  
26  
27 motion sensors. Motion sensors also provide real-time feedback for robotic actions including  
28  
29 closure of doors, limiting the animal's access to the gap, gating the sequence that control the  
30  
31 position of tactile targets, triggering the streaming of high-speed videography data to disk,  
32  
33 repositioning the camera to ensure optimal field-of-view independent from the target location, and,  
34  
35 if required, delivery of the reward.  
36  
37  
38  
39  
40  
41  
42  
43  
44  
45  
46  
47  
48  
49  
50  
51  
52  
53  
54  
55  
56  
57  
58  
59  
60  
61  
62  
63  
64  
65

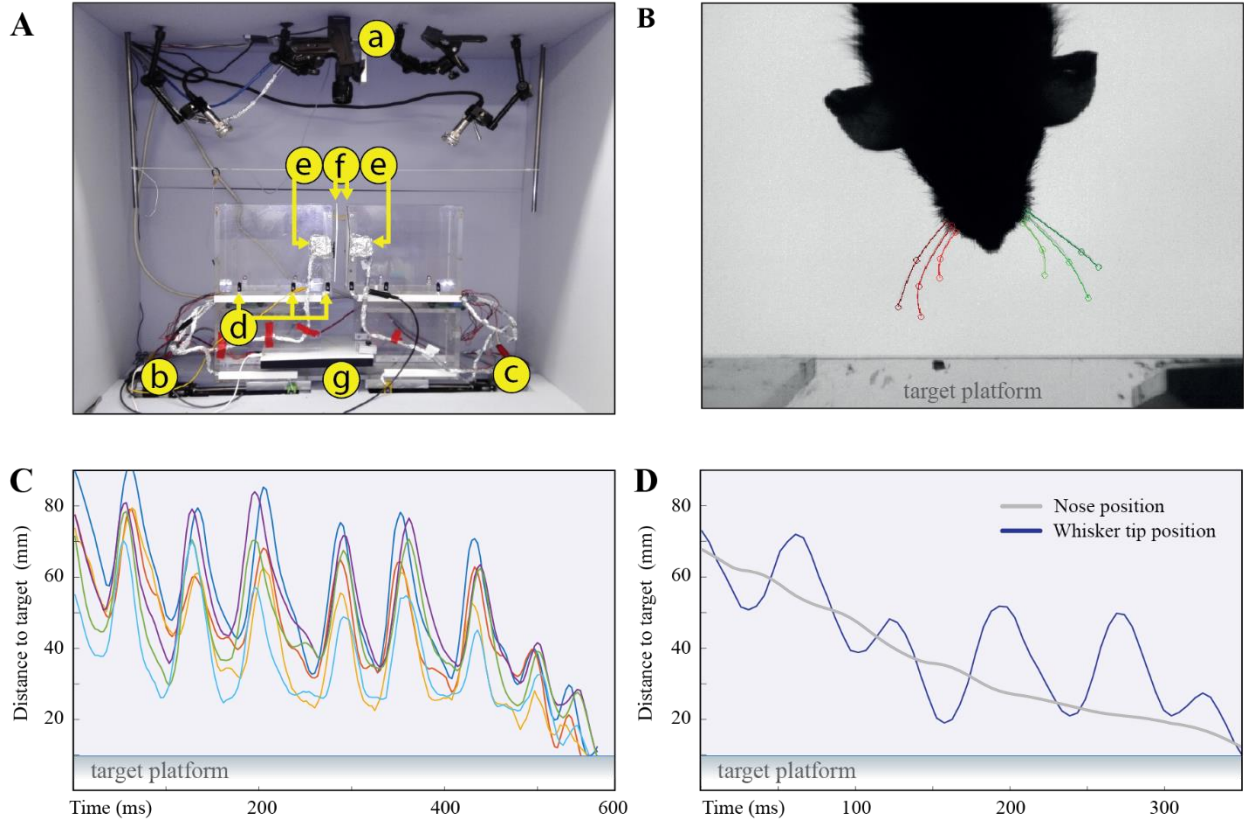

**Figure 2. Experimental set-up and sample behavioral data.** (A) The experimental set-up is installed in a sound attenuated chamber. Three linear actuators (a-c) mobilize a high-speed camera and tactile targets. Infrared motion sensors (d; 3x/platform) provide positional information about the animal and gate all actuators. Servo motors (e) installed at the ends of the platforms by the gap mobilize PVC panels (f) that act as gates. Gates are closed between trials and during tactile target motion. A custom made infrared (890nm) panel provide background illumination for the video recordings. (B) A sample still image with human observers' ground truth data about whisker positions are overlaid. Images were acquired at either 480fps with a resolution of 512x640 (110 microm/pixel) using a PointGrey Flea3 (FLIR, Germany) camera (in mice) or at 220fps (240x320 pixels; 625 microm/pixel) using an AVT Pike (Allied Vision, Germany) camera (in rats). (C) Whisker tip position for 6 whiskers as a rat located the target. Each color corresponds to one whisker. (D) Similar to C but for single whisker along with the corresponding trace of nose position.

1  
2  
3  
4 Each session starts with the experimenter positioning the animal on one of the two platforms. The  
5  
6 task of the animal in any given trial is to locate the other platform, if it is within tactile reach. The  
7  
8 success on the task is defined as the animal traveling between the two far ends of the platforms, as  
9  
10 assessed by motion sensors in real-time. If an animal starts and returns to the same starting position  
11  
12 without interrupting the middle motion sensor on the other platform, the trial is classified as a  
13  
14 failure. Animals are allowed to visit the gap as many time as they require before making a decision  
15  
16 on whether or not to gap-cross. Upon decision, the door attached to the only access point of the  
17  
18 platform that the animal is located upon is closed and the target platform is positioned in its new  
19  
20 position as described above.  
21  
22  
23  
24  
25  
26  
27

28  
29 Animals' sensorimotor behavior as they attempt to locate the target is recorded using a high-speed  
30  
31 camera. The camera is mobilized using a linear actuator to ensure comparable field of view across  
32  
33 trials. An infrared backlight is positioned below the gap to provide the necessary contrast for  
34  
35 imaging (Figure 2B).  
36  
37  
38  
39

40  
41 The videography data can be used to track body and whisker position in high spatiotemporal  
42  
43 resolution. To provide the ground-truth data for future machine learning approaches for whisker  
44  
45 tracking, three human observers tracked whisker and nose position in a non-overlapping subset of  
46  
47 videos (>150 tracked frames/video). Corresponding raw data are provided in .mat (MATLAB)  
48  
49 format, see Figure 2C and 2D for sample traces, see Supplemental Table 1 for list of files that  
50  
51 include ground-truth tracking data. If animals made multiple attempts to locate the target, which  
52  
53 is common especially during the early phases of object localization training [1], the human  
54  
55 observers were instructed to focus on the last epoch of exploration.  
56  
57  
58  
59  
60  
61  
62  
63  
64  
65

## **Data format and online database organization**

All video files are stored as 4D matrices in .mat files as well as .mp4 files for streamlined navigation in standard browsers. The .mat formatted data can be visualized using “implay” function in the Image Processing Toolbox or using the standard “movie” function in MATLAB. Movies can be converted to other formats using built in functions “movie2avi” or “videowriter”. The videos can be manually or automatically segmented using open source software (e.g. [19-21]) The data is available online [22]. The hierarchy in the data organization is shown in Figure 3 and include, in descending order, species (rat vs mouse), age (juvenile vs adult), sensory exploration with single or multiple whiskers (e.g. single row or all whiskers intact) and transgenic, methods of intervention with serotonergic signaling along with corresponding controls. A tabulated excel document (Supplemental Table 1) provides the metadata about the experimental details including date of experiment, session and trial numbers, gap-distance, trial outcome (success vs failure), and whether the video is human clicked.

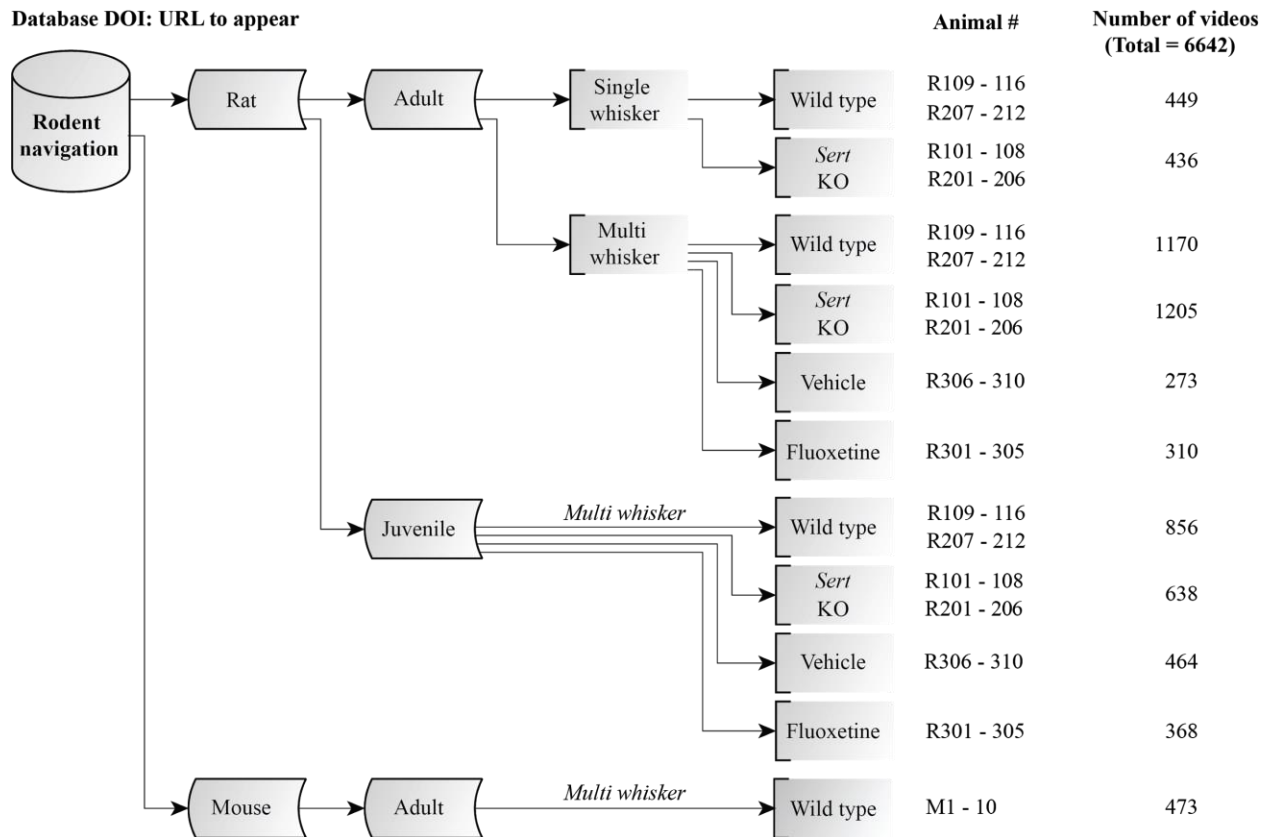

**Figure 3. Organization of the dataset.** See main text for details.

### Data Validation and Quality Control

Video acquisition was initiated when the animal triggered a motion sensor located at the start of the gap while standing at the edge of the home platform. Despite having started the gap-exploration, animals often opt to abort the search for the target platform before advancing towards the target. Therefore, all videos were screened individually using a custom written software in MATLAB and only those videos where animals successfully located the target platform were included in the database.

Whiskers in a proportion of the database (619/6642 videos) were manually tracked by human

1  
2  
3  
4 observers using a custom written interface in MATLAB [19]. The observers monitored a non-  
5  
6 overlapping set of videos. The number of frames tracked varied across videos as the duration of  
7  
8 exploration is not constant across trials, but was >150 frames/video, six whiskers/frame.  
9  
10

## 11 12 13 14 15 16 **Application scenarios** 17

18  
19 This database will help to address numerous fundamental questions in systems neuroscience,  
20  
21 including but not limited to (1) development of sensorimotor computation, (2) top-down  
22  
23 mechanisms that control sensory navigation and whisker position, (3) cross-species comparison of  
24  
25 active sensing. By comparing the sensorimotor exploration across wild-type juvenile and adult  
26  
27 animals one could address how adaptive control of body and whisker position develop. Because  
28  
29 adaptive motor control of whiskers is likely to be an outcome of a vector computation that ensures  
30  
31 spatial constancy despite the coupled changes in the body [2], developmental changes in body  
32  
33 positional control in respect to whisking might unravel the sequential development of motor  
34  
35 control. Repeating the same analysis across SERT KO, Fluoxetine and the corresponding control  
36  
37 animals would help to address the role of serotonin in shaping motor development and  
38  
39 consequences of altered serotonergic signaling in sensorimotor control in adulthood. Finally, by  
40  
41 comparing the sensorimotor exploration between the multi-whiskered rats and mice one could  
42  
43 address cross-species differences in adaptive motor control during object localization.  
44  
45  
46  
47  
48  
49  
50

51  
52  
53 The data provided could serve the on-going machine learning efforts that will ultimately allow  
54  
55 automated segmentation of whiskers in near real-time, i.e in temporal resolution shorter than the  
56  
57 duration of a whisk cycle. To ensure the usability of the database as a training set, we have  
58  
59  
60



1  
2  
3  
4 included ground-truth data from a subset of video recordings. Understanding the principles of  
5  
6 active sensing in biological systems might help to instruct adaptive solutions for artificial systems  
7  
8 to adapt sensory navigation to the ever-changing motor demands of the navigating agent.  
9  
10

## 11 12 13 14 **Limitations**

15  
16 Freely behaving animal experiments are often burdened by high-dimensionality and the associated  
17  
18 sampling limitations. Even if animals execute behavior in a constrained environment, e.g.  
19  
20 exploring a stationary target while standing on an elevated platform, as in the behavioral  
21  
22 experiments described herein, animals could change their approach angle, kinematics of whisking,  
23  
24 duration of exploration, number of whisker used to sample the target, head angle and head  
25  
26 elevation among other variables across different trials. Previous studies quantifying the sensory,  
27  
28 motor and perceptual behavior during whisker based object localization showed that both rats and  
29  
30 mice perform spontaneous gap-crossing in a stereotypical manner and that ~100 trials (10  
31  
32 trials/animal) is sufficient to gather reproducible statistics of sensory and motor behaviors [1, 6, 8,  
33  
34 13, 15, 22]. Thus, the current dataset with 6,642 independent observations across 11 independent  
35  
36 conditions (including species, age, genetic, pharmacological and sensory deprivation  
37  
38 interventions) should provide sufficient sampling to address fundamental questions outlined in the  
39  
40 previous section. However, we would like to attract the attention of the reader that the dataset  
41  
42 does not include data from female animals.  
43  
44  
45  
46  
47  
48  
49  
50  
51  
52

## 53 **Availability of Source Code and Requirements**

54  
55 Project name: MATLAB Whisker Tracker

56  
57 Project home page: <https://github.com/DepartmentofNeurophysiology/Matlab-Whisker-Tracker>  
58  
59

1  
2  
3  
4 Operating system(s): Platform independent

5  
6  
7 Programming language: MATLAB

8  
9 Other requirements: MATLAB 2017a or higher

10  
11 License: GNU GPL

12  
13  
14 RRID: SCR\_016538

15  
16  
17  
18 **Availability of the supporting data**

19 Snapshots of the database and code, including further supporting data is available in the  
20 *GigaScience* repository, GigaDB [23].

21  
22  
23 **Declarations**

24  
25  
26 **List of abbreviations**

27 SERT KO Serotonin transporter knock-out rats, i.e. 5-HTT-/-  
28 WT Wild type controls accompanying the SERT KO, i.e. 5-HTT+/  
29 Fluox Rats received Fluoxetine in drinking water  
30 Vehicle Control rats, drinking regular tap water  
31  
32  
33

34  
35 **Consent for publication**

36 N/A  
37

38  
39 **Competing interests**

40 The authors declare that they have no competing interests.  
41  
42

43 **Funding**

44 This work was supported by the European Commission (Horizon2020, nr. 660328), European  
45 Regional Development Fund (MIND, nr. 122035) and the Netherlands Organisation for Scientific  
46 Research (NWO-ALW Open Competition, nr. 824.14.022).  
47  
48  
49  
50

51 **Author contributions**

52  
53  
54  
55 

| Contributor Role | Author |
|------------------|--------|
|------------------|--------|

  
56  
57  
58  
59  
60  
61  
62  
63  
64  
65

1  
2  
3  
4  
5  
6  
7  
8  
9  
10  
11  
12  
13  
14  
15  
16  
17  
18  
19  
20  
21  
22  
23  
24  
25  
26  
27  
28  
29  
30  
31  
32  
33  
34  
35  
36  
37  
38  
39  
40  
41  
42  
43  
44  
45  
46  
47  
48  
49  
50  
51  
52  
53  
54  
55  
56  
57  
58  
59  
60  
61  
62  
63  
64  
65

---

|                                             |                                                                                                                                                                       |
|---------------------------------------------|-----------------------------------------------------------------------------------------------------------------------------------------------------------------------|
| <b>Conceptualization</b>                    | Tansu Celikel (TC)                                                                                                                                                    |
| <b>Supervision</b>                          | TC                                                                                                                                                                    |
| <b>Project Administration</b>               | TC                                                                                                                                                                    |
| <b>Investigation</b>                        | Alireza Azarfar (AA), Yiping Zhang (YZ), Artoghrul Alishbayli (ArA), Stéphanie Miceli (SM), Lara Kepser (LK), Daan van der Wielen (DvdW), Mike van de Moosdijk (MvdM) |
| <b>Formal Analysis</b>                      | AA                                                                                                                                                                    |
| <b>Software</b>                             | AA, Remi Proville (RP), TC                                                                                                                                            |
| <b>Methodology</b>                          | TC                                                                                                                                                                    |
| <b>Validation</b>                           | AA, YZ, ArA, SM, LK, DvdW, MvdM                                                                                                                                       |
| <b>Data Curation</b>                        | AA                                                                                                                                                                    |
| <b>Resources</b>                            | TC, Judith Homberg (JH), Dirk Schubert (DS)                                                                                                                           |
| <b>Funding Acquisition</b>                  | TC                                                                                                                                                                    |
| <b>Writing - Original Draft Preparation</b> | AA, TC                                                                                                                                                                |
| <b>Writing - Review &amp; Editing</b>       | AA, YZ, ArA, SM, LK, DvdW, MvdM, JH, DS, RP, TC                                                                                                                       |

---

1  
2  
3  
4  
5  
6  
7  
8  
9  
10  
11  
12  
13  
14  
15  
16  
17  
18  
19  
20  
21  
22  
23  
24  
25  
26  
27  
28  
29  
30  
31  
32  
33  
34  
35  
36  
37  
38  
39  
40  
41  
42  
43  
44  
45  
46  
47  
48  
49  
50  
51  
52  
53  
54  
55  
56  
57  
58  
59  
60  
61  
62  
63  
64  
65

---

**Visualization**

AA, TC

---

## References

1. Celikel T, Sakmann B. Sensory integration across space and in time for decision making in the somatosensory system of rodents. *Proc Natl Acad Sci USA*. 2007;104:1395–400. doi:10.1073/pnas.0610267104.
2. Schroeder JB, Ritt JT. Selection of head and whisker coordination strategies during goal-oriented active touch. *J Neurophysiol*. 2016;115:1797–809. doi:10.1152/jn.00465.2015.
3. Haidarliu S, Kleinfeld D, Deschênes M, Ahissar E. The Musculature That Drives Active Touch by Vibrissae and Nose in Mice. *Anat Rec (Hoboken)*. 2015;298:1347–58. doi:10.1002/ar.23102.
4. Huet LA, Hartmann MJZ. The search space of the rat during whisking behavior. *J Exp Biol*. 2014;217 Pt 18:3365–76. doi:10.1242/jeb.105338.
5. Arkley K, Grant RA, Mitchinson B, Prescott TJ. Strategy change in vibrissal active sensing during rat locomotion. *Curr Biol*. 2014;24:1507–12. doi:10.1016/j.cub.2014.05.036.
6. Voigts J, Herman DH, Celikel T. Tactile object localization by anticipatory whisker motion. *J Neurophysiol*. 2015;113:620–32. doi:10.1152/jn.00241.2014.
7. Clem RL, Celikel T, Barth AL. Ongoing in vivo experience triggers synaptic metaplasticity in the neocortex. *Science*. 2008;319:101–4. doi:10.1126/science.1143808.
8. Voigts J, Sakmann B, Celikel T. Unsupervised whisker tracking in unrestrained behaving animals. *J Neurophysiol*. 2008;100:504–15. doi:10.1152/jn.00012.2008.
9. Freudenberg F, Marx V, Seeburg PH, Sprengel R, Celikel T. Circuit mechanisms of GluA1-dependent spatial working memory. *Hippocampus*. 2013;23:1359–66. doi:10.1002/hipo.22184.
10. Celikel T, Marx V, Freudenberg F, Zivkovic A, Resnik E, Hasan MT, et al. Select overexpression of homer1a in dorsal hippocampus impairs spatial working memory. *Front Neurosci*. 2007;1:97–110. doi:10.3389/neuro.01.1.1.007.2007.
11. Mitchinson B, Martin CJ, Grant RA, Prescott TJ. Feedback control in active sensing: rat exploratory whisking is modulated by environmental contact. *Proc Biol Sci*. 2007;274:1035–41. doi:10.1098/rspb.2006.0347.
12. Grant RA, Sperber AL, Prescott TJ. The role of orienting in vibrissal touch sensing. *Front Behav Neurosci*. 2012;6:39. doi:10.3389/fnbeh.2012.00039.
13. Juczewski K, von Richthofen H, Bagni C, Celikel T, Fisone G, Krieger P. Somatosensory map expansion and altered processing of tactile inputs in a mouse model of fragile X syndrome. *Neurobiol Dis*. 2016;96:201–15. doi:10.1016/j.nbd.2016.09.007.
14. Hattox A, Li Y, Keller A. Serotonin regulates rhythmic whisking. *Neuron*. 2003;39:343–52.
15. Miceli S, Nadif Kasri N, Joosten J, Huang C, Kepser L, Proville R, et al. Reduced Inhibition

1  
2  
3  
4 within Layer IV of Sert Knockout Rat Barrel Cortex is Associated with Faster Sensory  
5 Integration. *Cereb Cortex*. 2017;27:933–49. doi:10.1093/cercor/bhx016.  
6

7  
8 16. Schubert D, Nadif Kasri N, Celikel T, Homberg J. Impact of monoaminergic  
9 neuromodulators on the development of sensorimotor circuits. In: *Sensorimotor Integration in*  
10 *the Whisker System*. Krieger P, Groh A, editors. Springer; 2015. p. 243–73.  
11

12  
13 17. Homberg JR, Olivier JDA, Smits BMG, Mul JD, Mudde J, Verheul M, et al. Characterization  
14 of the serotonin transporter knockout rat: a selective change in the functioning of the  
15 serotonergic system. *Neuroscience*. 2007;146:1662–76. doi:10.1016/j.neuroscience.2007.03.030.  
16

17  
18 18. Erzurumlu RS, Gaspar P. Development and critical period plasticity of the barrel cortex. *Eur*  
19 *J Neurosci*. 2012;35:1540–53. doi:10.1111/j.1460-9568.2012.08075.x.

20  
21 19. <https://bitbucket.org/benglitz/controller-dnp/downloads/>,

22  
23 20. <https://github.com/AlexEMG/DeepLabCut>,

24  
25 21. <https://github.com/DepartmentofNeurophysiology/Matlab-Whisker-Tracker>)  
26

27  
28 22. Pang RD, Wang Z, Klosinski LP, Guo Y, Herman DH, Celikel T, et al. Mapping functional  
29 brain activation using [14C]-iodoantipyrine in male serotonin transporter knockout mice. *PLoS*  
30 *ONE*. 2011;6:e23869. doi:10.1371/journal.pone.0023869.  
31

32  
33 23. Azarfar A; Zhang Y; Alishbayli A; Miceli S; Kepser L; der Wielen Dv; de Moosdijk Mv;  
34 Homberg J; Schubert D; Proville R; Celikel T: Supporting data for "An open-source high-speed  
35 infrared videography database to study the principles of active sensing in freely navigating  
36 rodents" GigaScience Database. 2018. <http://dx.doi.org/10.5524/100512>  
37  
38  
39  
40  
41  
42  
43  
44  
45  
46  
47  
48  
49  
50  
51  
52  
53  
54  
55  
56  
57  
58  
59  
60  
61  
62  
63  
64  
65

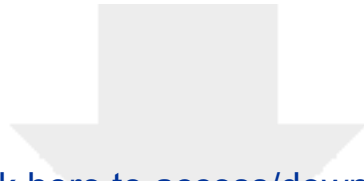

[Click here to access/download](#)

**Supplementary Material**

[Azarfar\\_Metadata\\_Supplemental Table1.xlsx](#)

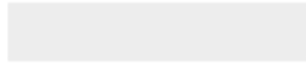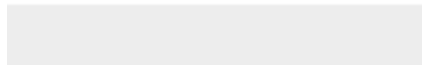

Supplement: giy134_giga-d-18-00333_revision_1.pdf [file giy134_giga-d-18-00333_revision_1.pdf]
