# Supplementary material for: An open-source high-speed infrared videography database to study the principles of active sensing in freely navigating rodents
Source: PubMed Central journal article supplement (PMC6283211; doi:10.1093/gigascience/giy134), 2018-11-10
Supplement: giy134_giga-d-18-00333_original_submission.pdf [file giy134_giga-d-18-00333_original_submission.pdf]

# GigaScience

## An open-source high-speed infrared videography database to study the principles of active sensing in freely navigating rodents --Manuscript Draft--

|                                                      |                                                                                                                                                                                                                                                                                                                                                                                                                                                                                                                                                                                                                                                                                                                                                                                                                                                                                                                                                                                                                                                                                                                                                                                                                                                                                                                                                                                                                                                                                                                                                                                                                                                                                                                                                                                                                                                                                                                                                                                  |                   |
|------------------------------------------------------|----------------------------------------------------------------------------------------------------------------------------------------------------------------------------------------------------------------------------------------------------------------------------------------------------------------------------------------------------------------------------------------------------------------------------------------------------------------------------------------------------------------------------------------------------------------------------------------------------------------------------------------------------------------------------------------------------------------------------------------------------------------------------------------------------------------------------------------------------------------------------------------------------------------------------------------------------------------------------------------------------------------------------------------------------------------------------------------------------------------------------------------------------------------------------------------------------------------------------------------------------------------------------------------------------------------------------------------------------------------------------------------------------------------------------------------------------------------------------------------------------------------------------------------------------------------------------------------------------------------------------------------------------------------------------------------------------------------------------------------------------------------------------------------------------------------------------------------------------------------------------------------------------------------------------------------------------------------------------------|-------------------|
| <b>Manuscript Number:</b>                            | GIGA-D-18-00333                                                                                                                                                                                                                                                                                                                                                                                                                                                                                                                                                                                                                                                                                                                                                                                                                                                                                                                                                                                                                                                                                                                                                                                                                                                                                                                                                                                                                                                                                                                                                                                                                                                                                                                                                                                                                                                                                                                                                                  |                   |
| <b>Full Title:</b>                                   | An open-source high-speed infrared videography database to study the principles of active sensing in freely navigating rodents                                                                                                                                                                                                                                                                                                                                                                                                                                                                                                                                                                                                                                                                                                                                                                                                                                                                                                                                                                                                                                                                                                                                                                                                                                                                                                                                                                                                                                                                                                                                                                                                                                                                                                                                                                                                                                                   |                   |
| <b>Article Type:</b>                                 | Data Note                                                                                                                                                                                                                                                                                                                                                                                                                                                                                                                                                                                                                                                                                                                                                                                                                                                                                                                                                                                                                                                                                                                                                                                                                                                                                                                                                                                                                                                                                                                                                                                                                                                                                                                                                                                                                                                                                                                                                                        |                   |
| <b>Funding Information:</b>                          | H2020 European Research Council (660328)                                                                                                                                                                                                                                                                                                                                                                                                                                                                                                                                                                                                                                                                                                                                                                                                                                                                                                                                                                                                                                                                                                                                                                                                                                                                                                                                                                                                                                                                                                                                                                                                                                                                                                                                                                                                                                                                                                                                         | Dr. Tansu Celikel |
|                                                      | Interreg (122035)                                                                                                                                                                                                                                                                                                                                                                                                                                                                                                                                                                                                                                                                                                                                                                                                                                                                                                                                                                                                                                                                                                                                                                                                                                                                                                                                                                                                                                                                                                                                                                                                                                                                                                                                                                                                                                                                                                                                                                | Dr. Tansu Celikel |
|                                                      | Nederlandse Organisatie voor Wetenschappelijk Onderzoek (824.14.022)                                                                                                                                                                                                                                                                                                                                                                                                                                                                                                                                                                                                                                                                                                                                                                                                                                                                                                                                                                                                                                                                                                                                                                                                                                                                                                                                                                                                                                                                                                                                                                                                                                                                                                                                                                                                                                                                                                             | Dr. Tansu Celikel |
| <b>Abstract:</b>                                     | <p>Background: Active sensing is crucial for navigation. It is characterized by self-generated motor action controlling the accessibility and processing of sensory information. In rodents, active sensing is commonly studied in the whisker system. As rats and mice modulate their whisking contextually, they employ frequency and amplitude modulation. Understanding the development, mechanisms and plasticity of adaptive motor control will require precise behavioral measurements of whisker position.</p> <p>Findings: Advances in high-speed videography and analytical methods now permit collection and systematic analysis of large datasets. Here we provide 6642 videos as freely moving juvenile (3rd-4th postnatal week) and adult rodents explore a stationary object on the gap-crossing task. The dataset includes sensory exploration with single- or multi-whiskers in wild-type animals, serotonin transporter knock-out rats, rats received pharmacological intervention targeting serotonergic signaling. The dataset includes varying background illumination conditions and signal-to-noise ratios (SNRs), ranging from homogenous/high contrast to non-homogenous/low-contrast. A subset of videos has been whisker and nose tracked, and are provided as reference for image processing algorithms.</p> <p>Conclusions: The recorded behavioral data can be directly used to study (1) development of sensorimotor computation, (2) top-down mechanisms that control sensory navigation and whisker position, (3) cross-species comparison of active sensing. It could also help to address contextual modulation of active sensing during touch induced whisking in head-fixed versus freely behaving animals. And finally, it provides the necessary data for machine learning approaches for automated analysis of sensory and motion parameters across a wide variety of SNRs with accompanying human observer determined ground-truth.</p> |                   |
| <b>Corresponding Author:</b>                         | Tansu Celikel, PhD<br>Donders Institute for Brain, Cognition and Behaviour<br>NETHERLANDS                                                                                                                                                                                                                                                                                                                                                                                                                                                                                                                                                                                                                                                                                                                                                                                                                                                                                                                                                                                                                                                                                                                                                                                                                                                                                                                                                                                                                                                                                                                                                                                                                                                                                                                                                                                                                                                                                        |                   |
| <b>Corresponding Author Secondary Information:</b>   |                                                                                                                                                                                                                                                                                                                                                                                                                                                                                                                                                                                                                                                                                                                                                                                                                                                                                                                                                                                                                                                                                                                                                                                                                                                                                                                                                                                                                                                                                                                                                                                                                                                                                                                                                                                                                                                                                                                                                                                  |                   |
| <b>Corresponding Author's Institution:</b>           | Donders Institute for Brain, Cognition and Behaviour                                                                                                                                                                                                                                                                                                                                                                                                                                                                                                                                                                                                                                                                                                                                                                                                                                                                                                                                                                                                                                                                                                                                                                                                                                                                                                                                                                                                                                                                                                                                                                                                                                                                                                                                                                                                                                                                                                                             |                   |
| <b>Corresponding Author's Secondary Institution:</b> |                                                                                                                                                                                                                                                                                                                                                                                                                                                                                                                                                                                                                                                                                                                                                                                                                                                                                                                                                                                                                                                                                                                                                                                                                                                                                                                                                                                                                                                                                                                                                                                                                                                                                                                                                                                                                                                                                                                                                                                  |                   |
| <b>First Author:</b>                                 | Alireza Azarfar                                                                                                                                                                                                                                                                                                                                                                                                                                                                                                                                                                                                                                                                                                                                                                                                                                                                                                                                                                                                                                                                                                                                                                                                                                                                                                                                                                                                                                                                                                                                                                                                                                                                                                                                                                                                                                                                                                                                                                  |                   |
| <b>First Author Secondary Information:</b>           |                                                                                                                                                                                                                                                                                                                                                                                                                                                                                                                                                                                                                                                                                                                                                                                                                                                                                                                                                                                                                                                                                                                                                                                                                                                                                                                                                                                                                                                                                                                                                                                                                                                                                                                                                                                                                                                                                                                                                                                  |                   |
| <b>Order of Authors:</b>                             | Alireza Azarfar                                                                                                                                                                                                                                                                                                                                                                                                                                                                                                                                                                                                                                                                                                                                                                                                                                                                                                                                                                                                                                                                                                                                                                                                                                                                                                                                                                                                                                                                                                                                                                                                                                                                                                                                                                                                                                                                                                                                                                  |                   |
|                                                      | Yiping Zhang                                                                                                                                                                                                                                                                                                                                                                                                                                                                                                                                                                                                                                                                                                                                                                                                                                                                                                                                                                                                                                                                                                                                                                                                                                                                                                                                                                                                                                                                                                                                                                                                                                                                                                                                                                                                                                                                                                                                                                     |                   |
|                                                      | Artoghrl Alishbayli                                                                                                                                                                                                                                                                                                                                                                                                                                                                                                                                                                                                                                                                                                                                                                                                                                                                                                                                                                                                                                                                                                                                                                                                                                                                                                                                                                                                                                                                                                                                                                                                                                                                                                                                                                                                                                                                                                                                                              |                   |

|                                                                                                                                                                                                                                                                                                                                                                                                                                                                                                                                     |                      |
|-------------------------------------------------------------------------------------------------------------------------------------------------------------------------------------------------------------------------------------------------------------------------------------------------------------------------------------------------------------------------------------------------------------------------------------------------------------------------------------------------------------------------------------|----------------------|
|                                                                                                                                                                                                                                                                                                                                                                                                                                                                                                                                     | Stéphanie Miceli     |
|                                                                                                                                                                                                                                                                                                                                                                                                                                                                                                                                     | Lara Kepser          |
|                                                                                                                                                                                                                                                                                                                                                                                                                                                                                                                                     | Daan van der Wielen  |
|                                                                                                                                                                                                                                                                                                                                                                                                                                                                                                                                     | Mike van de Moosdijk |
|                                                                                                                                                                                                                                                                                                                                                                                                                                                                                                                                     | Judith Homberg       |
|                                                                                                                                                                                                                                                                                                                                                                                                                                                                                                                                     | Dirk Schubert        |
|                                                                                                                                                                                                                                                                                                                                                                                                                                                                                                                                     | Rémi Proville        |
|                                                                                                                                                                                                                                                                                                                                                                                                                                                                                                                                     | Tansu Celikel, PhD   |
| <b>Order of Authors Secondary Information:</b>                                                                                                                                                                                                                                                                                                                                                                                                                                                                                      |                      |
| <b>Additional Information:</b>                                                                                                                                                                                                                                                                                                                                                                                                                                                                                                      |                      |
| <b>Question</b>                                                                                                                                                                                                                                                                                                                                                                                                                                                                                                                     | <b>Response</b>      |
| Are you submitting this manuscript to a special series or article collection?                                                                                                                                                                                                                                                                                                                                                                                                                                                       | No                   |
| <p><b>Experimental design and statistics</b></p> <p>Full details of the experimental design and statistical methods used should be given in the Methods section, as detailed in our <a href="#">Minimum Standards Reporting Checklist</a>. Information essential to interpreting the data presented should be made available in the figure legends.</p> <p>Have you included all the information requested in your manuscript?</p>                                                                                                  | Yes                  |
| <p><b>Resources</b></p> <p>A description of all resources used, including antibodies, cell lines, animals and software tools, with enough information to allow them to be uniquely identified, should be included in the Methods section. Authors are strongly encouraged to cite <a href="#">Research Resource Identifiers</a> (RRIDs) for antibodies, model organisms and tools, where possible.</p> <p>Have you included the information requested as detailed in our <a href="#">Minimum Standards Reporting Checklist</a>?</p> | Yes                  |
| <b>Availability of data and materials</b>                                                                                                                                                                                                                                                                                                                                                                                                                                                                                           | Yes                  |

All datasets and code on which the conclusions of the paper rely must be either included in your submission or deposited in [publicly available repositories](#) (where available and ethically appropriate), referencing such data using a unique identifier in the references and in the “Availability of Data and Materials” section of your manuscript.

Have you have met the above requirement as detailed in our [Minimum Standards Reporting Checklist](#)?

1  
2  
3  
4 *A Datanote submission to GigaScience*  
5  
6  
7  
8  
9

10 **An open-source high-speed infrared videography database to study the principles of active**  
11 **sensing in freely navigating rodents**  
12  
13  
14

15 Alireza Azarfar<sup>1</sup>, Yiping Zhang<sup>1</sup>, Artoghrul Alishbayli<sup>1</sup>, Stéphanie Miceli<sup>2, CA</sup>, Lara Kepser<sup>2</sup>,  
16 Daan van der Wielen<sup>1</sup>, Mike van de Moosdijk<sup>1</sup>, Judith Homberg<sup>2</sup>, Dirk Schubert<sup>2,1</sup>,  
17 Rémi Proville<sup>1</sup>, Tansu Celikel<sup>1\*</sup>  
18  
19  
20

21 (1) Department of Neurophysiology, Donders Institute for Brain, Cognition, and Behaviour,  
22 Radboud University, Nijmegen - the Netherlands. (2) Department of Cognitive Neuroscience,  
23 Donders Institute for Brain, Cognition, and Behaviour, Radboud University Medical School,  
24 Nijmegen - the Netherlands. <sup>CA</sup> Current address: Center of Advanced European Studies and  
25 Research, Bonn, Germany  
26  
27  
28  
29  
30  
31

32 E-mail addresses: [a.azarfar@neurophysiology.nl](mailto:a.azarfar@neurophysiology.nl), [y.zhang@neurophysiology.nl](mailto:y.zhang@neurophysiology.nl),  
33 [a.alishbayli@neurophysiology.nl](mailto:a.alishbayli@neurophysiology.nl), [stephanie.miceli@caesar.de](mailto:stephanie.miceli@caesar.de), [larakepser11@gmail.com](mailto:larakepser11@gmail.com),  
34 [d.vanderwielen@neurophysiology.nl](mailto:d.vanderwielen@neurophysiology.nl), [m.vandemoosdijk@neurophysiology.nl](mailto:m.vandemoosdijk@neurophysiology.nl),  
35 [judith.homberg@radboudumc.nl](mailto:judith.homberg@radboudumc.nl), [d.schubert@donders.ru.nl](mailto:d.schubert@donders.ru.nl), [r.proville@neurophysiology.nl](mailto:r.proville@neurophysiology.nl),  
36 [t.celikel@neurophysiology.nl](mailto:t.celikel@neurophysiology.nl)  
37  
38

39 \*Corresponding author: Tansu Celikel  
40

41 3 Figures, 1 Supplemental Table, 19 References  
42  
43  
44

45 **Keywords:** Mystacial vibrissae, object localization, goal-directed behavior, mouse, rat,  
46 sensorimotor computation, whisking  
47  
48  
49

50 **Funding:**

51 This work was supported by the European Commission (Horizon2020, nr. 660328), European  
52 Regional Development Fund (MIND, nr. 122035) and the Netherlands Organisation for  
53 Scientific Research (NWO-ALW Open Competition, nr. 824.14.022).  
54  
55  
56  
57  
58  
59  
60  
61  
62  
63  
64  
65

1  
2  
3  
4 **Abstract**  
5  
6  
7

8 **Background:** Active sensing is crucial for navigation. It is characterized by self-generated motor  
9 action controlling the accessibility and processing of sensory information. In rodents, active  
10 sensing is commonly studied in the whisker system. As rats and mice modulate their whisking  
11 contextually, they employ frequency and amplitude modulation. Understanding the development,  
12 mechanisms and plasticity of adaptive motor control will require precise behavioral  
13 measurements of whisker position.  
14  
15  
16  
17  
18

19 **Findings:** Advances in high-speed videography and analytical methods now permit collection  
20 and systematic analysis of large datasets. Here we provide 6642 videos as freely moving juvenile  
21 (3rd-4th postnatal week) and adult rodents explore a stationary object on the gap-crossing task.  
22 The dataset includes sensory exploration with single- or multi-whiskers in wild-type animals,  
23 serotonin transporter knock-out rats, rats received pharmacological intervention targeting  
24 serotonergic signaling. The dataset includes varying background illumination conditions and  
25 signal-to-noise ratios (SNRs), ranging from homogenous/high contrast to  
26 non-homogenous/low-contrast. A subset of videos has been whisker and nose tracked, and are  
27 provided as reference for image processing algorithms.  
28  
29  
30  
31  
32  
33  
34  
35  
36

37 **Conclusions:** The recorded behavioral data can be directly used to study (1) development of  
38 sensorimotor computation, (2) top-down mechanisms that control sensory navigation and  
39 whisker position, (3) cross-species comparison of active sensing. It could also help to address  
40 contextual modulation of active sensing during touch induced whisking in head-fixed versus  
41 freely behaving animals. And finally, it provides the necessary data for machine learning  
42 approaches for automated analysis of sensory and motion parameters across a wide variety of  
43 SNRs with accompanying human observer determined ground-truth.  
44  
45  
46  
47  
48  
49  
50  
51  
52  
53  
54  
55  
56  
57  
58  
59  
60  
61  
62  
63  
64  
65

## Data description

### Context

Whiskers, or mystacial vibrissae, are sensory hairs that are densely organized as a grid on the snout. Rats and mice actively move their whiskers in an oscillatory motion to explore their environment as they integrate sensory information spatiotemporally across whiskers and whisk cycles [1–5]. The motor control of whisker position is a result of sensorimotor computation where sensory information collected during the last ~3 whisk cycles is used to plan the whisker motion for the subsequent whisk cycle [6]. Although animals can perceive passive touch before the onset of whisking [7], it is not known when and where in the brain the sensorimotor computation for adaptive motor control for whisker position emerge. Moreover, the mechanisms responsible for the development and plasticity of sensorimotor computation are largely unknown. Because sensorimotor integration is contextually regulated [8–12], altered by the change in neuronal excitability along the sensorimotor circuits [13] and based on experience and the current state of the sensory organs [1], identification of the principles of sensorimotor computation will require large scale behavioral experiments where sensory input on whiskers and motor control of whisker position are studied at high spatiotemporal resolution. Here we introduce the first iteration of such a dataset as freely moving rodents locate a tactile target under infrared light. The dataset includes independent variables of species (rat vs mouse), developmental age (juvenile vs adult, i.e. 3-5 postnatal weeks and >6 weeks, respectively), sensory deprivation (single vs multi whisker) and genetic background (i.e. SERT knock-down vs control, see below). The database might serve researchers across a broad range of disciplines, including cellular, behavioral, systems, cognitive neuroscience, and ethology, biomimetics,

1  
2  
3  
4 robotics, artificial intelligence, computer vision and active sensing communities, to study and  
5  
6  
7 model the principles of active sensing.  
8  
9

## 10 11 **Animals**

12 All experiments have been performed according to the Dutch law concerning animal welfare and  
13  
14 the guidelines for the care and use of laboratory animals upon institutional ethical committee  
15  
16 approval. All efforts have been made to minimize animal suffering and discomfort, and all  
17  
18 precautions were taken to reduce the number of animals used.  
19  
20  
21  
22  
23  
24  
25  
26

27 The experiments were performed on 38 male rats and 10 male mice. Rats were either genetically  
28  
29 engineered or pharmacologically treated to alter serotonergic neurotransmission, a  
30  
31 neuromodulatory neurotransmitter that contributes to motor control [14], stimulus encoding in  
32  
33 the barrel cortex [15], and is believed to modulate development and maturation of sensorimotor  
34  
35 circuits [16]. Experiments in rats also included corresponding wild type and vehicle injection  
36  
37 controls. Mice were on the C57Bl6 background (B6;129P2-Pvalbtm1(cre)Arbr/J, The Jackson  
38  
39 Laboratory, RRID:MGI:5315557). Parvalbumin neurons in this line express Cre-recombinase  
40  
41 but the mice were otherwise not genetically or pharmacologically altered. The founder line was  
42  
43 outcrossed to C57Bl6 for 20+ generations before the start of experiments. All mice were studied  
44  
45 between 2-4 months of age.  
46  
47  
48  
49  
50  
51  
52  
53

54 Serotonin transporter knockout rats (Slc6a41Hubr) were generated on a Wistar background by  
55  
56 N-ethyl-N-nitrosurea (ENU)-induced mutagenesis as described before [17]. Experimental  
57  
58  
59  
60  
61  
62  
63  
64  
65

1  
2  
3  
4 animals were derived from heterozygous 5-HT transporter knockout (5HTT<sup>-/-</sup>) rats that were  
5  
6 outcrossed for 12+ generations with wild-type Wistar rats obtained from Harlan Laboratories  
7  
8 (Horst, The Netherlands). Ear punches were taken at the age of 21 days after weaning for  
9  
10 genotyping and 5HTT<sup>-/-</sup> and 5HTT<sup>+/+</sup> rats were randomly assigned to SERT KO (N=14 rats) and  
11  
12 WT groups (N=14 rats), respectively.  
13  
14  
15  
16  
17  
18

19 5-HT transporter deletion alters neural function starting from embryonic brain development [17].  
20  
21 Thus, in a second group of rats, we interfered with the serotonergic system after birth, and only  
22  
23 transiently when serotonergic innervations appear in the barrel cortex [9]. Fluoxetine  
24  
25 hydrochloride (10 mg/kg/day, Sigma Aldrich), a selective serotonin reuptake inhibitor, was  
26  
27 dissolved in water and administered orally. Age matched dams in a separate cage received tap  
28  
29 water and were considered as Vehicle controls. The fluoxetine administration started after birth  
30  
31 water and were considered as Vehicle controls. The fluoxetine administration started after birth  
32  
33 (P1) and continued for 7 days, corresponding to the period of postnatal development critical for  
34  
35 the maturation of thalamocortical projections [18]. The pups of all groups (Fluoxetine, N=5;  
36  
37 Vehicle, N=5) were kept together with their mothers until weaning.  
38  
39  
40  
41  
42  
43

#### 44 **Animal handling and behavioral observations**

45  
46  
47 Animal behavior was studied as they located (or attempted to locate) a tactile target under  
48  
49 infrared light between postnatal days (P) 21-P30, i.e. as juveniles, and/or after they reached  
50  
51 sexual maturity (Figure 1). Animal handling protocols were similar to those employed previously  
52  
53 [1, 6, 8, 13]. Experiments started with a familiarization session (20 min/animal) where P18 pup  
54  
55 (in rats) or adult mouse subjects were introduced to the experimenter and the experimental room  
56  
57  
58  
59  
60  
61  
62  
63  
64  
65



1  
2  
3  
4 the first time. Habituation to the set-up consisted of two 20 minute sessions under no visible light  
5  
6 but with white noise. The training sessions (N=10/rat; N=30/mouse) lasted 30 minutes (or 30  
7  
8 successful trials) in which the gap distance (see below) was randomly drawn from a Gaussian  
9  
10 distribution. With increasing number of sessions, the mean of the distribution was increased and  
11  
12 variance reduced, adapting each animal's individual learning curve, to ensure animals  
13  
14 preferentially use their whiskers for target localization in majority of the trials. The set-up was  
15  
16 cleaned with ethanol between sessions.  
17  
18  
19  
20  
21  
22  
23

24 One day before the sessions that required animals to perform the task with a restricted set of  
25  
26 whiskers, animals were anesthetized using isoflurane. Half of the animals received whisker  
27  
28 plucking sparing a single (C2) whisker or single (C) row bilaterally; the other half received  
29  
30 "sham plucking" during which they were handled similarly to the whisker deprived animals,  
31  
32 however their whiskers were left unplucked. Whisker regrowth was assessed every day, and if  
33  
34 needed whisker plucking was repeated.  
35  
36  
37  
38  
39  
40  
41  
42

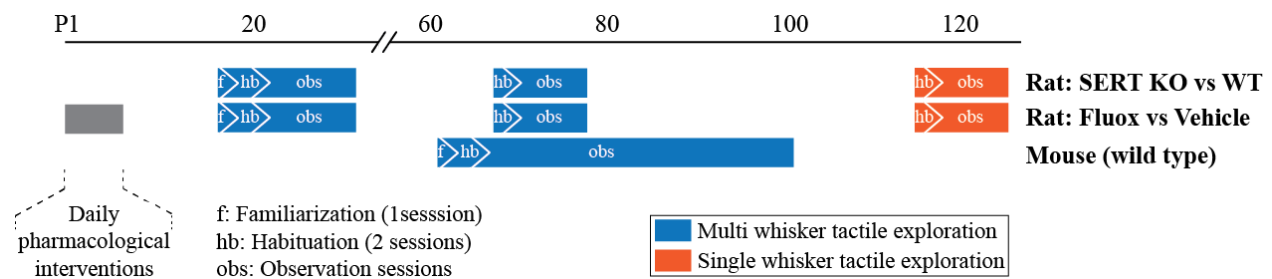

**Figure 1. The timeline of experiments and handling.** See main text for details.

## **The behavioral paradigm: Tactile object localization**

We observed animals, under infrared light, as they shuttled between two elevated platforms with a variable gap-distance in between them. The animals were not food deprived; neither did they receive any reward for successful task execution. In this, so called spontaneous gap-crossing task [1, 6, 8, 13], the distance between the platforms is varied to enable observation of whisker dependent tactile object localization. In our training protocols, the gap-distance was randomly selected from a normal distribution whose mean increases and variance reduces with repeated training (i.e. increased number of training sessions) as described before [15]. Catch trials, where the target platform is positioned just outside of the animal's reach, were randomly introduced (~15% of successful trials) to ensure that the task execution required tactile exploration and was not a result of expectation and sensorimotor habit formation.

## **The experimental set-up and data acquisition**

The experimental set-up consists of two elevated platforms and a high-speed camera that are mobilized by linear actuators (Figure 2A). The animal position on the platforms are tracked using motion sensors. Motion sensors also provide real-time feedback for robotic actions including closure of doors, limiting the animal's access to the gap, gating the sequence that control the position of tactile targets, triggering the streaming of high-speed videography data to disk, repositioning the camera to ensure optimal field-of-view independent from the target location, and, if required, delivery of the reward.

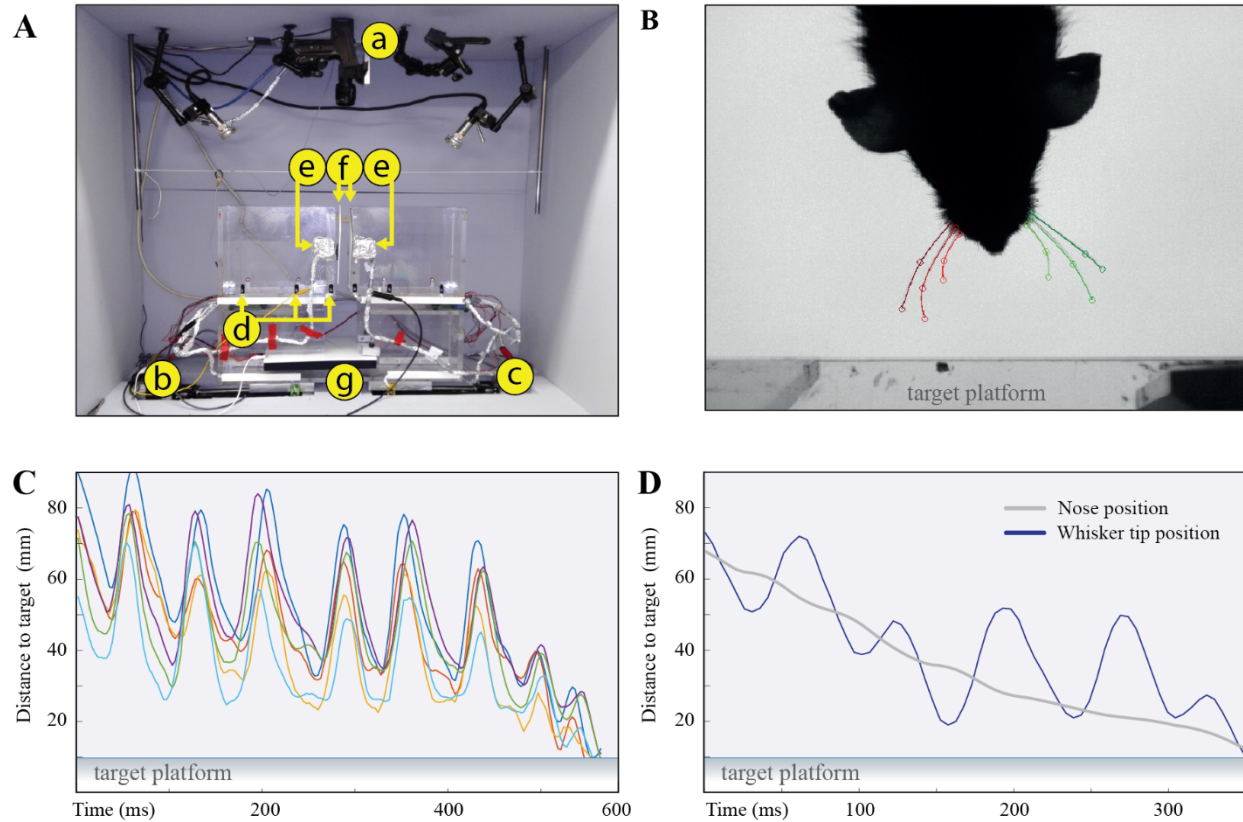

**Figure 2. Experimental set-up and sample behavioral data.** (A) The experimental set-up is installed in a sound attenuated chamber. Three linear actuators (a-c) mobilize a high-speed camera and tactile targets. Infrared motion sensors (d; 3x/platform) provide positional information about the animal and gate all actuators. Servo motors (e) installed at the ends of the platforms by the gap mobilize PVC panels (f) that act as gates. Gates are closed between trials and during tactile target motion. A custom made infrared (890nm) panel provide background illumination for the video recordings. (B) A sample still image with human observers' ground truth data about whisker positions are overlaid. Images were acquired at either 480fps with a resolution of 512x640 (110 microm/pixel) using a PointGrey Flea3 (FLIR, Germany) camera (in mice) or at 220fps (240x320 pixels; 625 microm/pixel) using an AVT Pike (Allied Vision, Germany) camera (in rats). (C) Whisker tip position for 6 whiskers as a rat located the target. Each color corresponds to one whisker. (D) Similar to C but for single whisker along with the corresponding trace of nose position.

1  
2  
3  
4  
5  
6  
7 Each session starts with the experimenter positioning the animal on one of the two platforms.  
8  
9 The task of the animal in any given trial is to locate the other platform, if it is within tactile  
10 reach. The success on the task is defined as the animal traveling between the two far ends of the  
11 platforms, as assessed by motion sensors in real-time. If an animal starts and returns to the same  
12 starting position without interrupting the middle motion sensor on the other platform, the trial is  
13 classified as a failure. Animals are allowed to visit the gap as many time as they require before  
14 making a decision on whether or not to gap-cross. Upon decision, the door attached to the only  
15 access point of the platform that the animal is located upon is closed and the target platform is  
16 positioned in its new position as described above.  
17  
18  
19  
20  
21  
22  
23  
24  
25  
26  
27  
28  
29  
30  
31

32 Animals' sensorimotor behavior as they attempt to locate the target is recorded using a  
33 high-speed camera. The camera is mobilized using a linear actuator to ensure comparable field  
34 of view across trials. An infrared backlight is positioned below the gap to provide the necessary  
35 contrast for imaging (Figure 2B).  
36  
37  
38  
39  
40  
41  
42  
43

44 The videography data can be used to track body and whisker position in high spatiotemporal  
45 resolution. To provide the ground-truth data for future machine learning approaches for whisker  
46 tracking, three human observers tracked whisker and nose position in a non-overlapping subset  
47 of videos (>150 tracked frames/video). Corresponding raw data are provided in .mat (MATLAB)  
48 format, see Figure 2C and 2D for sample traces, see Supplemental Table 1 for list of files that  
49 include ground-truth tracking data. If animals made multiple attempts to locate the target, which  
50  
51  
52  
53  
54  
55  
56  
57  
58  
59  
60  
61  
62  
63  
64  
65

1  
2  
3  
4 is common especially during the early phases of object localization training ([Celikel and](#)  
5  
6  
7 [Sakmann 2007](#)), the human observers were instructed to focus on the last epoch of exploration.  
8  
9

## 10 11 **Data format and online database organization**

12 All video files are stored as 4D matrices in .mat files as well as .mp4 files for streamlined  
13  
14 navigation in standard browsers. The .mat formatted data can be visualized using “implay”  
15  
16 function in the Image Processing Toolbox or using the standard “movie” function in MATLAB.  
17  
18

19 Movies can be converted to other formats using built in functions “movie2avi” or “videowriter”.  
20  
21

22 The videos can be manually or automatically segmented using open source software (e.g.  
23  
24

25 <https://bitbucket.org/benglitz/controller-dnp/downloads/>,

26  
27 <https://github.com/AlexEMG/DeepLabCut>,

28  
29 <https://github.com/DepartmentofNeurophysiology/Matlab-Whisker-Tracker>)  
30  
31

32 The data is available online (DOI to appear here). The hierarchy in the data organization is  
33  
34 shown in Figure 3 and include, in descending order, species (rat vs mouse), age (juvenile vs  
35  
36 adult), sensory exploration with single or multiple whiskers (e.g. single row or all whiskers  
37  
38 intact) and transgenic, methods of intervention with serotonergic signaling along with  
39  
40 corresponding controls. A tabulated excel document (Supplemental Table 1) provides the  
41  
42 metadata about the experimental details including date of experiment, session and trial numbers,  
43  
44 gap-distance, trial outcome (success vs failure), and whether the video is human clicked.  
45  
46  
47  
48  
49  
50  
51  
52  
53  
54  
55  
56  
57  
58  
59  
60  
61  
62  
63  
64  
65

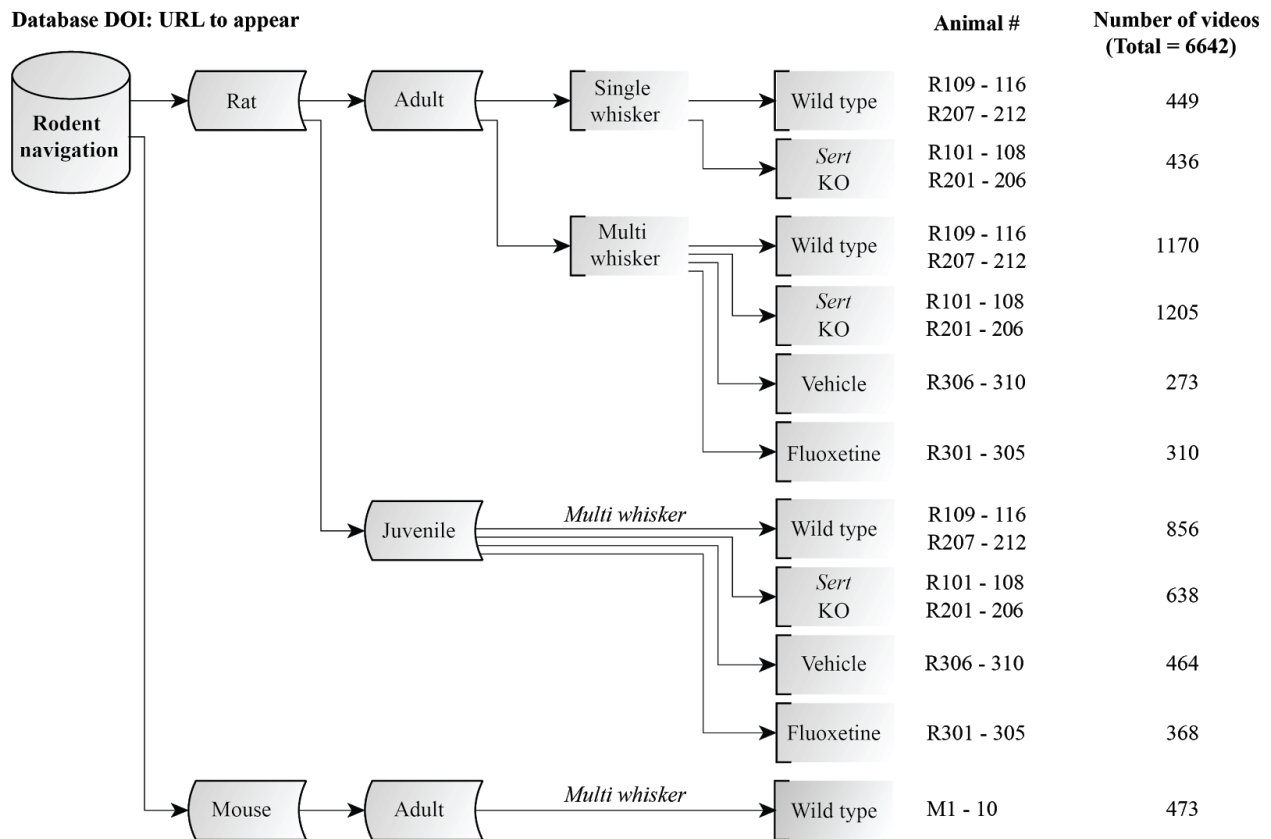

**Figure 3. Organization of the dataset.** See main text for details.

### Application scenarios

This database will help to address numerous fundamental questions in systems neuroscience, including but not limited to (1) development of sensorimotor computation, (2) top-down mechanisms that control sensory navigation and whisker position, (3) cross-species comparison of active sensing. By comparing the sensorimotor exploration across wild-type juvenile and adult animals one could address how adaptive control of body and whisker position develop. Because adaptive motor control of whiskers is likely to be an outcome of a vector computation that ensures spatial constancy despite the coupled changes in the body [2], developmental changes in body positional control in respect to whisking might unravel the sequential

1  
2  
3  
4 development of motor control. Repeating the same analysis across SERT KO, Fluoxetine and the  
5  
6 corresponding control animals would help to address the role of serotonin in shaping motor  
7  
8 development and consequences of altered serotonergic signaling in sensorimotor control in  
9  
10 adulthood. Finally, by comparing the sensorimotor exploration between the multi-whiskered rats  
11  
12 and mice one could address cross-species differences in adaptive motor control during object  
13  
14 localization.  
15  
16  
17  
18  
19  
20  
21

22 The data provided could serve the on-going machine learning efforts that will ultimately allow  
23  
24 automated segmentation of whiskers in near real-time, i.e in temporal resolution shorter than the  
25  
26 duration of a whisk cycle. To ensure the usability of the database as a training set, we have  
27  
28 included ground-truth data from a subset of video recordings. Understanding the principles of  
29  
30 active sensing in biological systems might help to instruct adaptive solutions for artificial  
31  
32 systems to adapt sensory navigation to the ever-changing motor demands of the navigating agent.  
33  
34  
35  
36  
37  
38

### 39 **Limitations**

40  
41  
42 Freely behaving animal experiments are often burdened by high-dimensionality and the  
43  
44 associated sampling limitations. Even if animals execute behavior in a constrained environment,  
45  
46 e.g. exploring a stationary target while standing on an elevated platform, as in the behavioral  
47  
48 experiments described herein, animals could change their approach angle, kinematics of  
49  
50 whisking, duration of exploration, number of whisker used to sample the target, head angle and  
51  
52 head elevation among other variables across different trials. Previous studies quantifying the  
53  
54 sensory, motor and perceptual behavior during whisker based object localization showed that  
55  
56  
57  
58  
59  
60  
61  
62  
63  
64  
65

1  
2  
3  
4 both rats and mice perform spontaneous gap-crossing in a stereotypical manner and that ~100  
5  
6 trials (10 trials/animal) is sufficient to gather reproducible statistics of sensory and motor  
7  
8 behaviors [1, 6, 8, 13, 15, 19]. Thus the current dataset with 6642 independent observations  
9  
10 across 11 independent conditions (including species, age, genetic, pharmacological and sensory  
11  
12 deprivation interventions) should provide sufficient sampling to address fundamental questions  
13  
14 outlined in the previous section. However, we would like to attract the attention of the reader  
15  
16 that the dataset does not include data from female animals.  
17  
18  
19  
20  
21  
22  
23

#### 24 **Availability of the supporting data**

25 Supporting data are available online (<https://goo.gl/QhYe2X>) and will be distributed via  
26  
27 GigaScience DB.  
28  
29

#### 30 **List of abbreviations**

31 SERT KO Serotonin transporter knock-out rats, i.e. 5-HTT-/-  
32  
33 WT Wild type controls accompanying the SERT KO, i.e. 5-HTT+/+  
34  
35 Fluox Rats received Fluoxetine in drinking water  
36  
37 Vehicle Control rats, drinking regular tap water  
38

#### 39 **Competing interests**

40 The authors declare no competing interests.  
41  
42

#### 43 **Author contributions**

44 AIA compiled and organized the database. AIA, YZ, ArA, DvdW, MvdM performed data  
45 analysis and quality control. SM and LK performed data acquisition. SM performed  
46 pharmacological interventions. JH provided the transgenic rats. DS contributed to experimental  
47 design. RP supervised image processing. TC designed and supervised the project, wrote the first  
48 version of the manuscript. All authors edited otherwise approved the final version of the  
49 manuscript.  
50  
51  
52  
53  
54  
55  
56  
57  
58  
59  
60  
61  
62  
63  
64  
65



## Bibliography

1. Celikel T, Sakmann B. Sensory integration across space and in time for decision making in the somatosensory system of rodents. *Proc Natl Acad Sci USA*. 2007;104:1395–400. doi:10.1073/pnas.0610267104.
2. Schroeder JB, Ritt JT. Selection of head and whisker coordination strategies during goal-oriented active touch. *J Neurophysiol*. 2016;115:1797–809. doi:10.1152/jn.00465.2015.
3. Haidarliu S, Kleinfeld D, Deschênes M, Ahissar E. The Musculature That Drives Active Touch by Vibrissae and Nose in Mice. *Anat Rec (Hoboken)*. 2015;298:1347–58. doi:10.1002/ar.23102.
4. Huet LA, Hartmann MJZ. The search space of the rat during whisking behavior. *J Exp Biol*. 2014;217 Pt 18:3365–76. doi:10.1242/jeb.105338.
5. Arkley K, Grant RA, Mitchinson B, Prescott TJ. Strategy change in vibrissal active sensing during rat locomotion. *Curr Biol*. 2014;24:1507–12. doi:10.1016/j.cub.2014.05.036.
6. Voigts J, Herman DH, Celikel T. Tactile object localization by anticipatory whisker motion. *J Neurophysiol*. 2015;113:620–32. doi:10.1152/jn.00241.2014.
7. Clem RL, Celikel T, Barth AL. Ongoing in vivo experience triggers synaptic metaplasticity in the neocortex. *Science*. 2008;319:101–4. doi:10.1126/science.1143808.
8. Voigts J, Sakmann B, Celikel T. Unsupervised whisker tracking in unrestrained behaving animals. *J Neurophysiol*. 2008;100:504–15. doi:10.1152/jn.00012.2008.
9. Freudenberg F, Marx V, Seeburg PH, Sprengel R, Celikel T. Circuit mechanisms of GluA1-dependent spatial working memory. *Hippocampus*. 2013;23:1359–66. doi:10.1002/hipo.22184.
10. Celikel T, Marx V, Freudenberg F, Zivkovic A, Resnik E, Hasan MT, et al. Select overexpression of homer1a in dorsal hippocampus impairs spatial working memory. *Front Neurosci*. 2007;1:97–110. doi:10.3389/neuro.01.1.1.007.2007.
11. Mitchinson B, Martin CJ, Grant RA, Prescott TJ. Feedback control in active sensing: rat exploratory whisking is modulated by environmental contact. *Proc Biol Sci*. 2007;274:1035–41. doi:10.1098/rspb.2006.0347.
12. Grant RA, Sperber AL, Prescott TJ. The role of orienting in vibrissal touch sensing. *Front Behav Neurosci*. 2012;6:39. doi:10.3389/fnbeh.2012.00039.
13. Juczewski K, von Richthofen H, Bagni C, Celikel T, Fisone G, Krieger P. Somatosensory map expansion and altered processing of tactile inputs in a mouse model of fragile X syndrome. *Neurobiol Dis*. 2016;96:201–15. doi:10.1016/j.nbd.2016.09.007.

1  
2  
3  
4 14. Hattox A, Li Y, Keller A. Serotonin regulates rhythmic whisking. *Neuron*. 2003;39:343–52.

5  
6 15. Miceli S, Nadif Kasri N, Joosten J, Huang C, Kepser L, Proville R, et al. Reduced Inhibition  
7 within Layer IV of Sert Knockout Rat Barrel Cortex is Associated with Faster Sensory  
8 Integration. *Cereb Cortex*. 2017;27:933–49. doi:10.1093/cercor/bhx016.

9  
10 16. Schubert D, Nadif Kasri N, Celikel T, Homberg J. Impact of monoaminergic  
11 neuromodulators on the development of sensorimotor circuits. In: *Sensorimotor Integration in*  
12 *the Whisker System*. Krieger P, Groh A, editors. Springer; 2015. p. 243–73.

13  
14 17. Homberg JR, Olivier JDA, Smits BMG, Mul JD, Mudde J, Verheul M, et al. Characterization  
15 of the serotonin transporter knockout rat: a selective change in the functioning of the  
16 serotonergic system. *Neuroscience*. 2007;146:1662–76. doi:10.1016/j.neuroscience.2007.03.030.

17  
18 18. Erzurumlu RS, Gaspar P. Development and critical period plasticity of the barrel cortex. *Eur*  
19 *J Neurosci*. 2012;35:1540–53. doi:10.1111/j.1460-9568.2012.08075.x.

20  
21 19. Pang RD, Wang Z, Klosinski LP, Guo Y, Herman DH, Celikel T, et al. Mapping functional  
22 brain activation using [14C]-iodoantipyrine in male serotonin transporter knockout mice. *PLoS*  
23 *ONE*. 2011;6:e23869. doi:10.1371/journal.pone.0023869.



Click here to access/download  
**Supplementary Material**  
Responses to reviewers.pdf



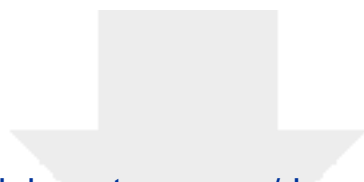

Click here to access/download  
**Supplementary Material**  
Azarfar\_Redlined.pdf

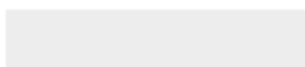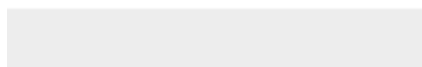

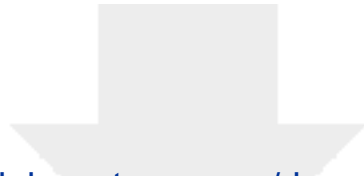

[Click here to access/download](#)

**Supplementary Material**

[Azarfar\\_Metadata\\_Supplemental Table1.xlsx](#)

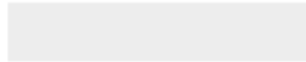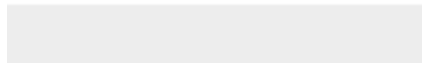

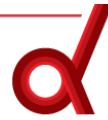

Professor Tansu Celikel, Ph.D.  
Founding Chair, Department of Neurophysiology

Founding Director,  
Dutch/German Graduate School in Bionics

Speaker, Donders Institute  
Theme: Brain Networks and Neuronal Communication

Heyendaalseweg 135  
6525 AJ, Nijmegen  
the Netherlands

 (+31) (0) 24 365 2702  
[www.ru.nl/neurophysiology](http://www.ru.nl/neurophysiology)  
[www.neurophysiology.nl](http://www.neurophysiology.nl)  
[t.celikel@donders.ru.nl](mailto:t.celikel@donders.ru.nl)

August 30th, 2018

Dear Editor,

Please accept the attached manuscript, entitled “**An open-source high-speed infrared videography database to study the principles of active sensing in freely navigating rodents**”, as a **Data Note** submission to Gigascience. This is a resubmission of our previously withdrawn manuscript, GIGA-D-16-00171.

Rodents are skillful navigators. Because they are nocturnal, and subterranean in the wild, they predominantly use their tactile senses to navigate their environments. Over the last decade, the whisker system of rodents has become a popular model of active sensing. Our own work [1-5], for example, has shown that rodents employ frequency and amplitude modulation to actively control the position of their whiskers in space [1] as they integrate sensory information across whiskers in millisecond resolution [2]. Although rodents can perceive passive touch even before the onset of whisking [3], adaptive motor control is a close-loop computation [4] and requires mature sensory and motor processing, regulated (at least in part) by serotonergic signaling [5]. This sensorimotor computation enable rapid coordinate transformation as animals employ a form of Bayesian computation to control the position of their whiskers in the future based on the sensory information collected during the last ~90 ms [4]. Neural mechanisms of adaptive sensorimotor computation are some of the most fundamental problems in Neuroscience, and already helped to develop novel algorithmic solutions for adaptive navigation in artificial systems. Thus, **the field of active sensing continuously attracts a broad multidisciplinary audience.**

**Here, we provide an extensive dataset that consists of 6642 high-speed videos (220-480 fps), recorded under infrared light as rats and mice located a stationary tactile target.** Since our original submission, GIGA-D-16-00171, we have extensively processed data to match the requirements of the reviewers, added over 500 new videos where human observers manually segmented whiskers and nose of the navigating animals and re-written large portions of the manuscript. To ensure that the end-user of the data can take advantage of the dataset, we have developed two video processing software which are freely distributed via GitHub and references in the manuscript.

**Our goal is to grow this database by systematically adding contextually classified new content;** currently ongoing work include observation of navigation during object discrimination, home-cage navigation, exploration of novel-objects and novel spaces. We believe this undertaking will prove to be the prime resource for researchers across a broad range of disciplines, including cellular, behavioral, systems, cognitive neuroscience, and ethology, biomimetics, robotics, artificial intelligence, computer vision and active sensing communities, to study and model the principles of active sensing. Thus, we are encouraged to submit this Data Note submission for your consideration.

Thank you for your consideration in advance,

Sincerely yours,



Tansu Celikel

#### References

1. Voigts et al. Journal of Neurophysiology, 100:504
2. Celikel and Sakmann. Proceedings of the National Academy of Sciences, USA, 104:1395
3. Clem et al. Science, 319:101
4. Voigts et al. Journal of Neurophysiology, 113:620
5. Miceli et al. Cerebral Cortex, 27:933
